# Supplementary material for: Impact of model improvements on 80-m wind speeds during the second Wind Forecast Improvement Project (WFIP2)
Source: Copernicus journal article supplement (doi:10.5194/gmd-2019-80), 2019-05-23
Supplement: Supplementary file [file gmd-2019-80-AC3-supplement.pdf]

# Interactive comment on “Impact of model improvements on 80-m wind speeds during the second Wind Forecast Improvement Project (WFIP2)” by Laura Bianco et al.

David Ham [david.ham@imperial.ac.uk](mailto:david.ham@imperial.ac.uk) Received and published: 26 July 2019

Thank you for your efforts to provide the code and data underpinning this manuscript. There are just a couple of points on which you are not quite currently compliant with GMD policy and which need to be fixed in the revised manuscript.

## GitHub URLs

GitHub is a great development platform, but it’s not a suitable long term data archive. GitHub themselves tell you to use Zenodo for this purpose: <https://guides.github.com/activities/citable-code>. Please use the instructions there to produce a Zenodo archive for the exact version of the code this manuscript describes and cite it. The Zenodo archive will even give you the BibTeX (or other reference manager) entry to paste in directly.

According to the Editor suggestion we did produce a Zenodo archive for the model code (<https://zenodo.org/record/3369984#.XVb6KpJKjUI>, doi:10.5281/zenodo.3369984). The text in the “Data and code availability” section has been changed accordingly.

## Data by URL

The WFIP2 data archive is impressively professional. However it is referenced by URL, which is unfortunate because URLs have a bad habit of going stale the next time an institution revamps its web presence. If at all possible, please provide a more persistent citation, such as a DOI, for this data. For more precise details of what is required, please see [https://www.geoscientific-model-development.net/about/code\\_and\\_data\\_policy.htm](https://www.geoscientific-model-development.net/about/code_and_data_policy.htm)

Unfortunately at this time a DOI number is not available for the DAP, but the archive is maintained through the Atmosphere to Electrons (A2e) research and development initiative, supported by the U.S. Department of Energy, Office of Energy Efficiency and Renewable Energy's Wind Energy Technologies Office to the aim of collect, store, and preserve A2e data. So, even if we are not directly in charge of the repository, we do not foresee a revamp of its web presence. All data from A2e projects are stored and disseminated via the A2e Data Archive and Portal at [a2e.energy.gov](http://a2e.energy.gov) and also other WFIP2 publications referred to the DAP by URL.
